# Supplementary material
Source: Springer Nature journal article supplement (https://www.springermedizin.de/resource/supplementary/12889_2014_6444_MOESM1_ESM.pdf/9498224)
Supplement: MOESM1 [file 9498224]

# Any patient visiting the village doctor for any reason

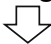

## Screening

1. Ask about current symptoms
2. Ask about disease history (stroke, CHD, hypertension, diabetes)
3. Measure blood pressure when necessary

Other patients

### CVD high-risk patients

1. stroke or CHD *or*
2. Age 50+(male)/60+(female) and has diabetes *or*
3. Age 50+(male)/60+(female) and SBP  $\geq 160$ mmHg

### Patients require urgent management

1. Symptoms suggestive of cardiovascular disease
2. SBP  $\geq 200$ mmHg

Usual care

### Initiate Management

1. Establish case management record
2. Ask about current medication use
3. Ask about current lifestyle, and provide lifestyle advice and health education materials
4. If SBP  $\geq 140$  mmHg begin antihypertensive medication
5. If positive history of cardiovascular disease + no hemorrhagic stroke + no other contraindications, begin aspirin

### Urgent management + referral

1. Lower BP if SBP  $\geq 160$ mmHg, observe for one hour, then refer
2. All other conditions, refer directly

## Follow-up & Management (at monthly clinic visits)

1. Measure blood pressure
2. Ask about new symptoms, or newly onset of stroke, coronary disease, hypertension, diabetes)
3. Ask about lifestyle changes
4. Ask about medication use (antihypertensive medication, aspirin)
5. Fill out case management record

Satisfactory outcomes:

SBP < 140 mmHg

### Unsatisfactory outcomes

1. SBP  $\geq 140$ mmHg, *or*
2. Non-use of aspirin, *or*
3. Continuing unhealthy lifestyle, e.g. smoking

### New medical conditions:

1. New symptoms indicative of acute cardiovascular disease
2. SBP  $\geq 200$ mmHg

Maintain care

### Intensify management\*

1. If SBP  $\geq 140$ mmHg, increase number or dosage of antihypertensive medication
2. Emphasize importance of taking aspirin if indicated
3. Intensify lifestyle intervention if required

### Urgent management + referral

1. Lower BP to 160 mmHg or lower, observe for one hour, then refer
2. All other conditions, refer
